# Supplementary material for: Gut derived-endotoxin contributes to inflammation in severe ischemic acute kidney injury
Source: PubMed Central journal article supplement (PMC6329050; doi:10.1186/s12882-018-1199-4), 2019-01-11
Supplement: 12882_2018_1199_MOESM1_ESM.pdf [file 12882_2018_1199_MOESM1_ESM.pdf]

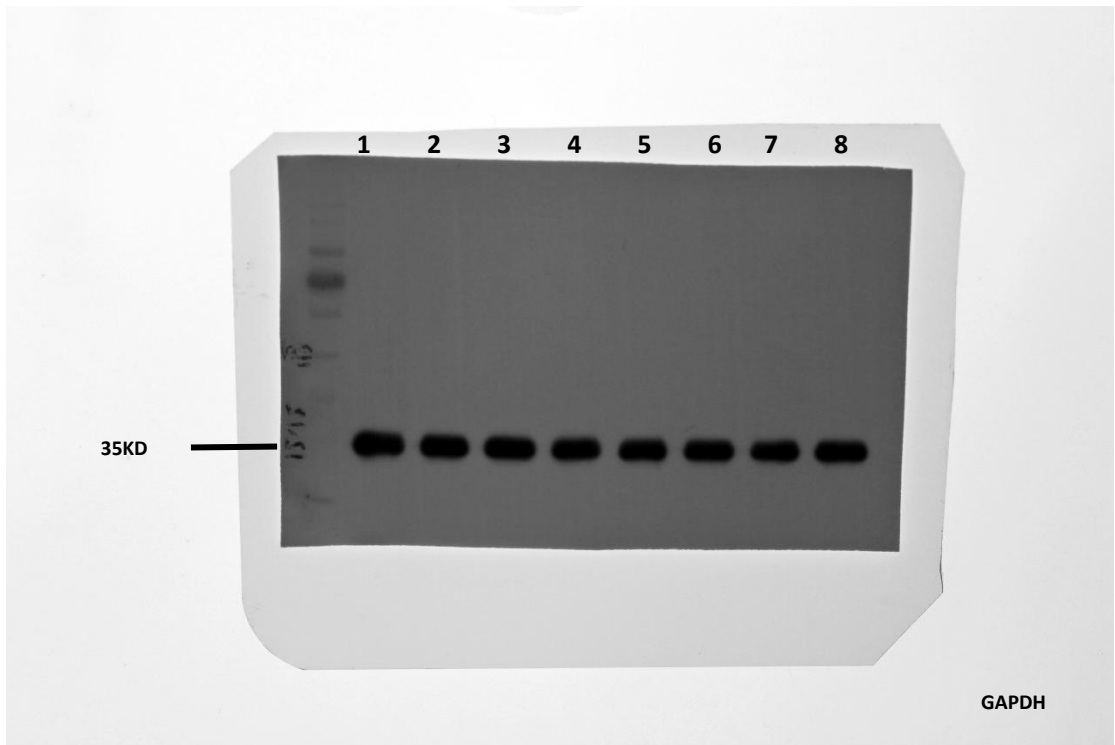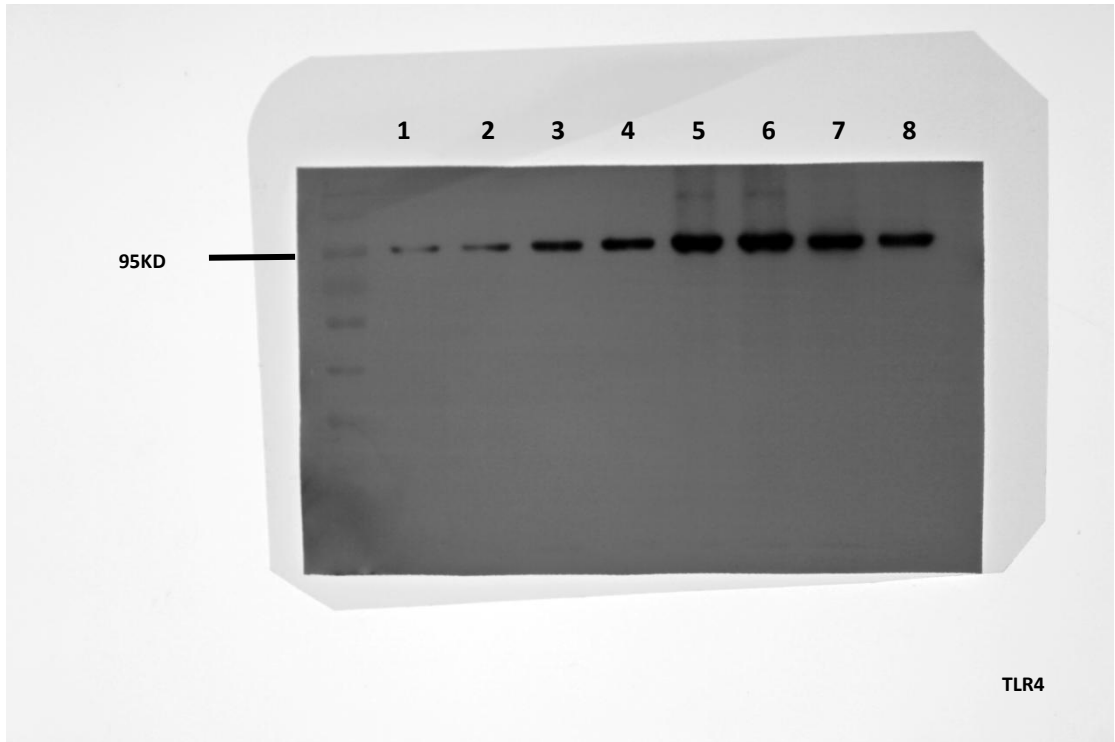



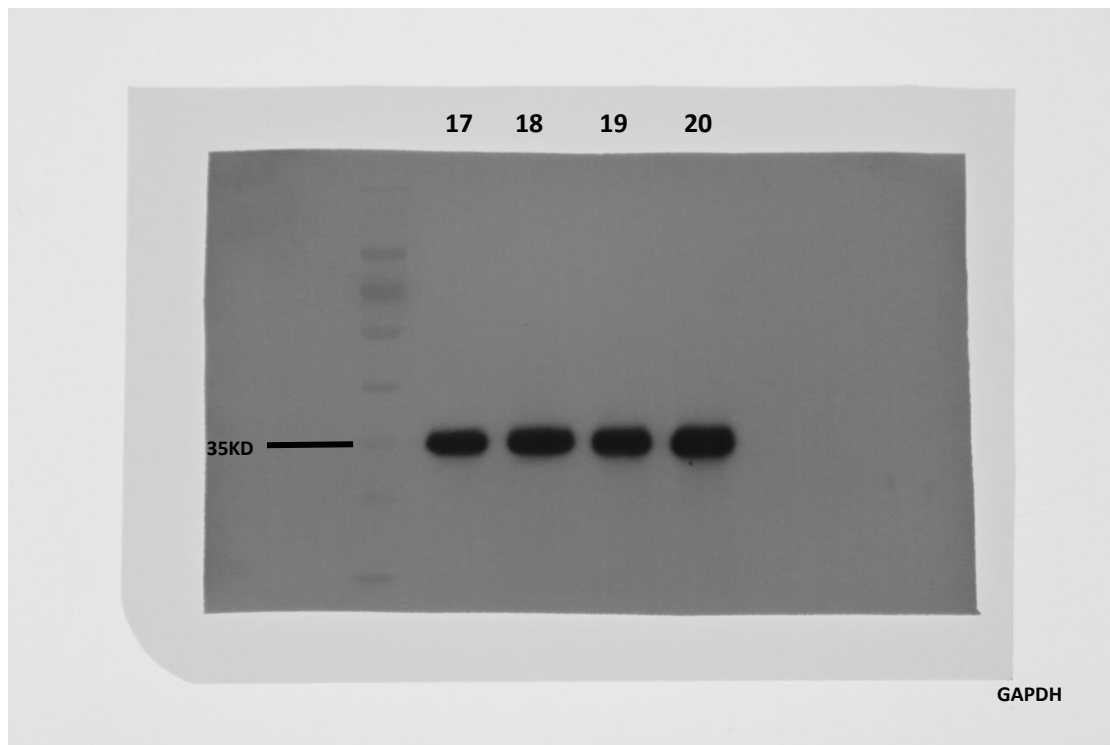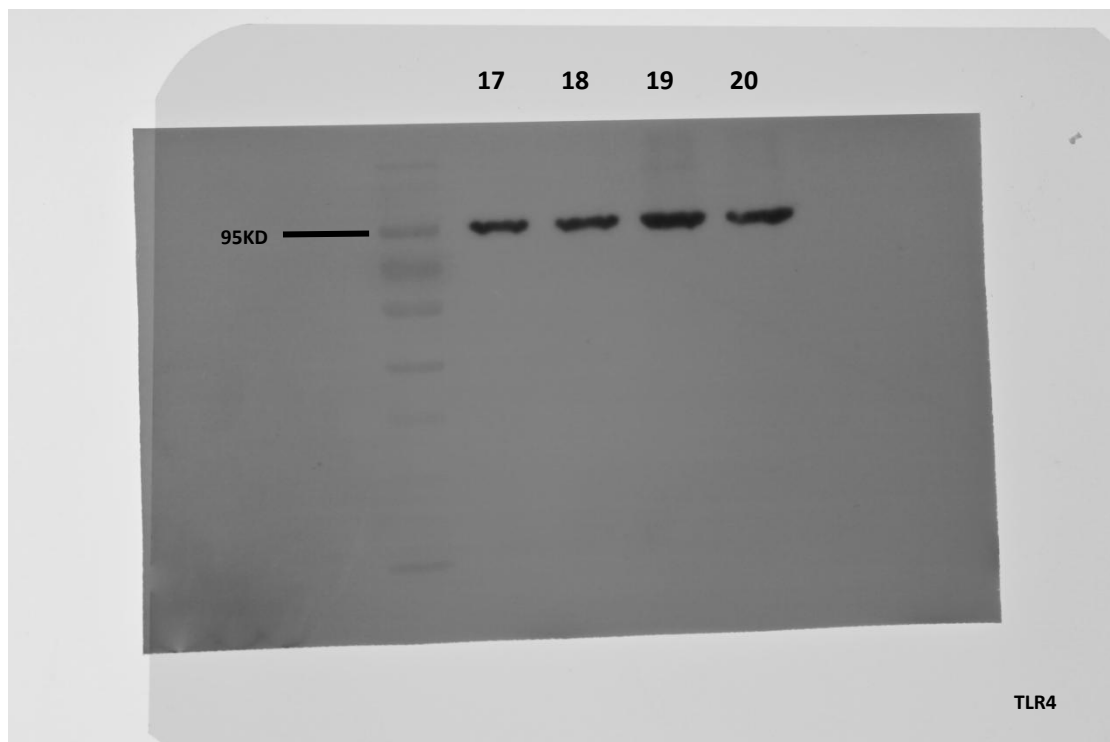

Uncropped Western blot images, these figures represent all blots that support results reported in Figure 3B. In these figures, full-length Western blot images are provided. Sham+Saline:1,2,9,10,17; Sham+Norflox:3,4,11,12,18;IR+Saline:5,6,13,14,19; IR+Norflox:7,8,15,16,20.
